# Supplementary material for: Personalized medicine in Europe: not yet personal enough?
Source: Springer Nature journal article supplement (doi:10.1186/s12913-017-2205-4), 2017-04-18

## Additional file 1 – summary of literature search methods

|                             |                                                                                                                                                                                                 |
|-----------------------------|-------------------------------------------------------------------------------------------------------------------------------------------------------------------------------------------------|
| Selected countries          | Austria<br><br>France<br><br>Germany<br><br>Hungary<br><br>Italy<br><br>Spain<br><br>Sweden<br><br>UK                                                                                           |
| Limits                      | General literature search: 2010 – Current                                                                                                                                                       |
| Publication types           | Case studies<br><br>Published literature reviews<br><br>Published guidelines/recommendations<br><br>Published reports<br><br>Interview transcripts<br><br>White papers<br><br>Research articles |
| Global electronic databases | Embase, MEDLINE                                                                                                                                                                                 |
| General websites            | ISPOR/ ASCO/ ESMO/ SMDM/ iHEA<br><br>WHO<br><br>HTAi<br><br>OECD                                                                                                                                |

|                           |                                                                                                                                                                                                                                                                                                                                                                                                                                              |
|---------------------------|----------------------------------------------------------------------------------------------------------------------------------------------------------------------------------------------------------------------------------------------------------------------------------------------------------------------------------------------------------------------------------------------------------------------------------------------|
|                           | <p>EFPIA</p> <p>DG SANCO</p> <p>European Commission</p> <p>ONCOTYROL</p> <p>CANCERGEN</p> <p>PHARMGKB</p> <p>EMA</p> <p>Patient and Clinician Engagement group (PACE)</p> <p>European Hospital Association</p>                                                                                                                                                                                                                               |
| Country specific websites | <p>NICE/ NHS/ NATIONAL CANCER FUND (UK)</p> <p>HAS/ CEPS/ ANSM/ INCa (France)</p> <p>IQWiG/ DIMDI/ G-BA (Germany)</p> <p>AIFA (Italy; plus regional websites)</p> <p>AETS (Spain; plus regional websites)</p> <p>SBU (Sweden)</p> <p>LBI-HTA (Austria)</p> <p>Austrian Social insurance (<a href="http://www.sozialversicherung.at">www.sozialversicherung.at</a>)</p> <p>NHIF (Hungary)</p> <p>SMC (Scotland)</p> <p>ZINL (Netherlands)</p> |
| Search Terms              | <p>Personalized Medicine/Care</p> <p>Individualised Medicine</p> <p>Stratified Medicine</p>                                                                                                                                                                                                                                                                                                                                                  |

|  |                                                                                                                                                                                                                                                                                                                                                                                                                                                                                                                                                                                                                                                                                                                                                                                                                                                                                                                            |
|--|----------------------------------------------------------------------------------------------------------------------------------------------------------------------------------------------------------------------------------------------------------------------------------------------------------------------------------------------------------------------------------------------------------------------------------------------------------------------------------------------------------------------------------------------------------------------------------------------------------------------------------------------------------------------------------------------------------------------------------------------------------------------------------------------------------------------------------------------------------------------------------------------------------------------------|
|  | <p>Segmented Medicine</p> <p>Targeted Therapies</p> <p>Any of the above with:</p> <ul style="list-style-type: none"><li>+ definition</li><li>+ individualised/stratified/specialised/segmented/integrated</li><li>+ genomics/proteomics/metabolomics</li><li>+ behavioural/psycho-social/social/individual needs</li><li>+ oncology/cancer/tumours/neoplasm</li><li>+ technology/diagnostics</li><li>+ health care/pharmaceuticals</li><li>+ Europe/France/Italy (including regions)/Germany/Spain<br/>(including regions)/ UK/England/ Austria/ Sweden/ Hungary</li><li>+ expectations</li><li>+stakeholders/payers/providers/clinical/patients/public/consumer<br/>/patient satisfaction</li><li>+ pharmaceutical + medical<br/>devices/products/devices/treatment/novel/innovative/companion<br/>diagnostics</li><li>+ outcomes</li><li>+ ethics/ethical</li><li>+ Challenges</li><li>+ Patient's Preferences</li></ul> |
|--|----------------------------------------------------------------------------------------------------------------------------------------------------------------------------------------------------------------------------------------------------------------------------------------------------------------------------------------------------------------------------------------------------------------------------------------------------------------------------------------------------------------------------------------------------------------------------------------------------------------------------------------------------------------------------------------------------------------------------------------------------------------------------------------------------------------------------------------------------------------------------------------------------------------------------|

|                                                                |                                                                                                                                                                                                                                                                                                                                                                                                                                                                                 |
|----------------------------------------------------------------|---------------------------------------------------------------------------------------------------------------------------------------------------------------------------------------------------------------------------------------------------------------------------------------------------------------------------------------------------------------------------------------------------------------------------------------------------------------------------------|
|                                                                | <p>+ Economic Models</p> <p>+ Health Technology</p> <p>Assessment/HTA/Funding/Pricing/Reimbursement</p> <p>Companion Diagnostics</p> <p>Challenges</p>                                                                                                                                                                                                                                                                                                                          |
| <p>Criteria for inclusion in the review – topics discussed</p> | <p>Definition of personalized medicine</p> <p>Predominant components of personalized medicine</p> <p>Methods for patient segmentation, and current best practices</p> <p>Current HTA, reimbursement, pricing and funding processes for personalized medicine, and impact of these on patient access</p> <p>Specific tools or methods used to inform investment decisions surrounding personalized medicine</p> <p>Challenges to the implementation of personalized medicine</p> |

AETS, Agencia de Evaluación de Tecnologías Sanitarias; AIFA, Agenzia Italiana del Farmaco; ANSM, Agence nationale de sécurité du médicament et des produits de santé; ASCO, American Society of Clinical Oncology; CANCERGEN, Cancer Genetics Network; CEPS, Comité Économique des Produits de Santé; DG SANCO, European Commission Directorate General for Health and Consumer Protection; DIMDI, German Institute of Medical Documentation and Information; EFPIA, European Federation of Pharmaceutical Industries and Associations; EMA, European Medicines Association; ESMO, European Society for Medical Oncology; G-BA, Gemeinsamer BundesAusschuss; HAS, Haute Autorité de santé; HTA, Health Technology Assessment; HTAi, Health Technology Assessment international; iHEA, International Health Economics Association; INCA, French National Cancer Institute; IQWiG, Institut für Qualität und Wirtschaftlichkeit im Gesundheitswesen; ISPOR, International Society for

Pharmacoeconomic and Outcomes Research; LBI-HTA, Ludwig Boltzmann Institute for Health Technology Assessment; NHIF, National Health Insurance Fund; NHS, National Health Service (UK); NICE, National Institute for Health and Care Excellence; ONCOTYROL, Center for Personalized Cancer Medicine (Innsbruck, Austria); OECD, Organisation for Economic Co-operation and Development; PACE, Patient and Clinician Engagement group; PHARMGKB, Pharmacogenomics Knowledgebase; SBU, Swedish Agency for Health Technology Assessment and Assessment of Social Services; SMC, Scottish Medicines Consortium; SMDM, Society for Medical Decision Making; WHO, World Health Organization; ZINL, Zorginstituut Nederland.

## PRISMA diagram of publications identified in literature search

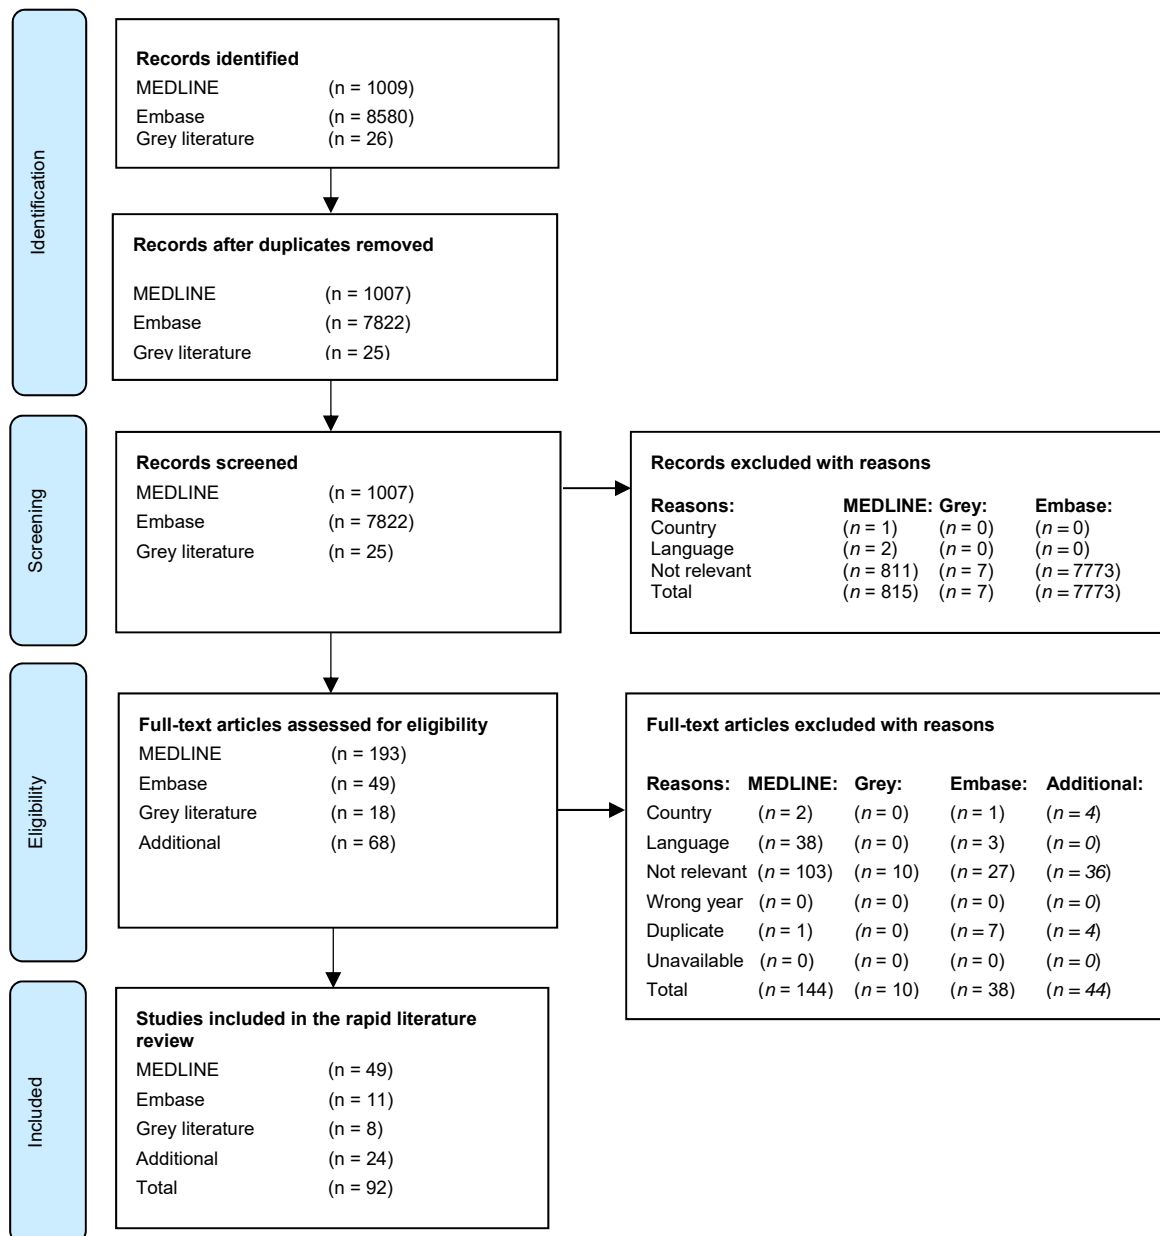

Supplement: MOESM1 [file 12231232]
